# Supplementary material for: Direct observation of magnetic ordering in the (CH3NH2)K3C60fulleride
Source: Royal Society of Chemistry journal article supplement (doi:10.1039/b614596e), 2006-11-30
Supplement: b614596e.pdf [file b614596e.pdf]

# Supplementary Material (ESI) for Chemical Communications

# This journal is (c) The Royal Society of Chemistry 2006

#### Description of the ZF- $\mu^+$ SR Technique

$\mu^+$ SR in its various forms (ZF, LF, TF) is a powerful probe of the magnetic properties of materials.<sup>5</sup> The 100% spin-polarised  $\mu^+$  beam is stopped in the sample and the time histograms of  $\mu^+$  decay positrons are recorded by forward ( $F$ ) and backward ( $B$ ) counters as a function of time. Since a positron is emitted preferentially towards the  $\mu^+$  spin direction, the time-dependent asymmetry  $A(t) = (F - B)/(F + B)$  reflects the time evolution of the  $\mu^+$  spin polarisation. After coming to rest at interstitial sites of the solid, the  $\mu^+$  precess in the local magnetic fields  $\langle B_{\mu} \rangle$  with a precession frequency,  $\nu_{\mu} = (\gamma_{\mu}/2\pi)\langle B_{\mu} \rangle$ , where  $\gamma_{\mu}/2\pi = 13.55$  kHz/G. In the absence of an applied field, a precession signals the onset of an ordering (FM or AF) transition. Application of a longitudinal magnetic field (LF) allows the decoupling of the  $\mu^+$  spin from the static internal fields. Although for powder samples such as the present fulleride, the exact  $\mu^+$  site is not known, it is expected that the  $\mu^+$  will reside near the negatively charged  $C_{60}^{3-}$  units.
